# Supplementary material
Source: publisher figshare collection journal article supplement (https://gsajournals.figshare.com/ndownloader/files/26557610)
Supplement: Supplementary file 1 [file 26557610]

## Sheet: Sheet1
Table S3. Genome contiguity statistics of the Hermetia illucens genome.
Statistics	bp	#
Sum	1004932590	20
N50	180357958	3
N60	173077783	4
N70	173077783	4
N80	116824456	5
N90	103444952	6
N100	11090	20
Largest	222122703	1
